# Supplementary material for: Nociception in Chicken Embryos, Part I: Analysis of Cardiovascular Responses to a Mechanical Noxious Stimulus
Source: Animals (Basel). 2023 Aug 25;13(17):2710. doi: 10.3390/ani13172710 (PMC10486618; doi:10.3390/ani13172710)
Supplement: Supplementary file 1 [file animals-13-02710-s001.zip › Table_S1.xlsx]

## Sheet: Statistical metrics
Paired t-test (two-tailed)	MAP				HR
ED	18	16	13	12	18	17	15	14	13	7
Figure	2c	2a	S1d	S1c	3c	3b	S3f	S3e	S3d	S3a
number of samples	10	10	10	10	10	10	10	10	10	3
Mean difference	14212	4351	-0.674	-0.524	3068	2888	0.494	0.288	0.734	-1834
SD of differences	12088	2763	1811	1.132	3254	3036	2038	1712	2307	4875
SEM of differences	3823	0.874	0.573	0.358	1029	0.960	0.645	0.541	0.730	2814
p-value	0.0048	0.0008	0.2692	0.1775	0.0154	0.0148	0.4631	0.6071	0.3408	0.5815
t-value	3718	4980	1178	1463	2981	3008	0.7663	0.5328	1006	0.6516
degrees of freedom df	9	9	9	9	9	9	9	9	9	2
95 % CI lower	5564	2375	-1970	-1334	0.7397	0.7160	-0.9641	-0.9361	-0.9166	-13.94
95 % CI upper	22.86	6328	0.6212	0.2862	5396	5059	1952	1513	2384	10.28
effect size (Cohen's d pooled variance)	1622	2464	0.539	0.645	1144	1343	0.347	0.176	0.353	0.751
effect size r	0.778	0.857	0.365	0.438	0.705	0.708	0.248	0.175	0.318	0.418
Wilcoxon signed-rank test (two-tailed)	MAP					HR
ED	17	15	14	9	7	16	12	9
Figure	2b	S1f	S1e	S1b	S1a	3a	S3c	S3b
number of samples	10	10	10	6	3	10	10	6
Median of differences	7117	1204	-0.4764	-0.03964	-0.1774	1457	0.2806	0.5080
p-value	0.0020	0.1934	0.6953	>0.9999	>0.9999	0.1309	0.3223	0.1563
z-score	2803	1376	0.459	0.105	0.000	1580	1070	1572
effect size r	0.627	0.308	0.103	-0.030	0.000	0.353	0.239	0.454
one-way ANOVA (Figure 4a)	Sum of scquares (SS)	df	Mean scquares (MS)	F-value (Levene's test)
between groups	1269.647	3	423216	11764
within groups (error)	1446.955	28	51677
total	2716.602	31
effect size η2	0.467
effect size r	0.6834
Kruskal-Wallis test	HR
ED	18 Lido
Figure	4b
total number of samples	32
H-value	11924
effect size η2	0.319
effect size r	0.5648
